# Supplementary material
Source: PubMed Central journal article supplement (PMC10390025)
Supplement: joces-133-247593-s1.pdf [file joces-133-247593-s1.pdf]

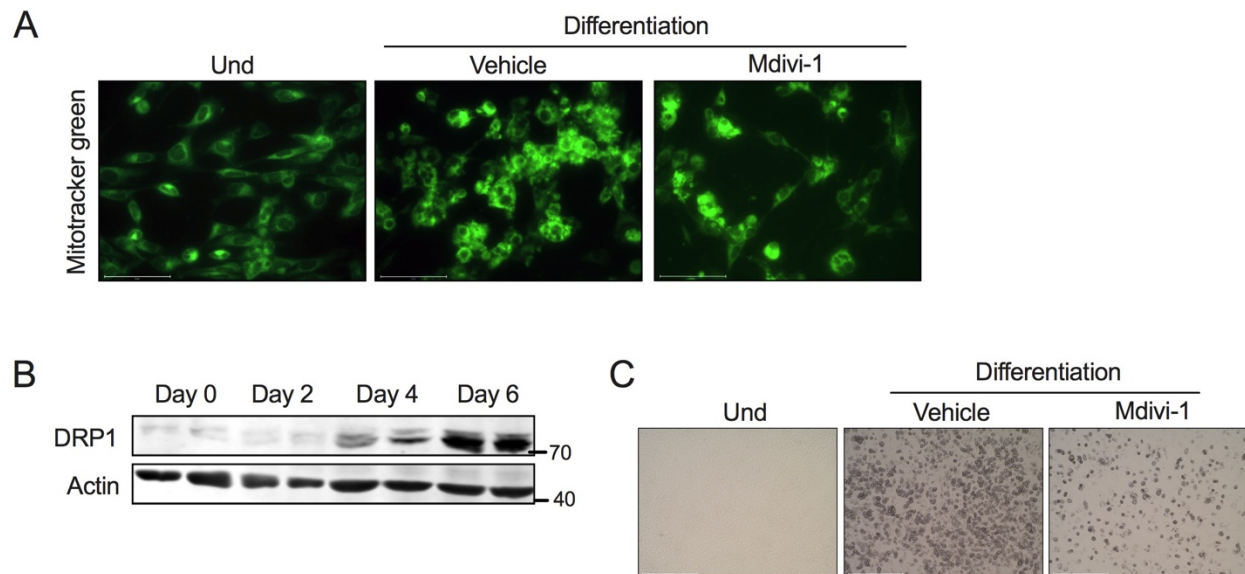

Figure S1. **DRP1 is essential for the differentiation of brown adipose tissue SVF cells.** (A) Representative images of the SVF cells differentiated to beige adipocytes in the presence or absence of 10 $\mu$ M Mdivi-1 and stained with the mitotracker Green FM. Scale bars = 75 $\mu$ m. (B) Immunoblots for DRP1 in primary mouse SVF cells from brown adipose tissue of C57BL6 that were differentiated into brown adipocytes. (C) Representative images of the SVF cells from brown adipose tissue differentiated to brown adipocytes in the presence or absence of 10 $\mu$ M Mdivi-1 added from day 0 of differentiation. Scale bars = 500 $\mu$ m.

**Table S1. Primer sequence details**

| Gene                            | Forward (5'-3')         | Reverse (5'-3')          |
|---------------------------------|-------------------------|--------------------------|
| <i>Cox1</i>                     | TAGCCCATGCAGGAGCATCA    | TGGCTGGGGGTTTCATGTTGA    |
| <i>Cox2</i>                     | ACCTGGTGAACACTACGACTGCT | CCTAGGGAGGGGACTGCTCA     |
| <i>ATP6</i>                     | TGGCATTAGCAGTCCGGCTT    | ATGGTAGCTGTTGGTGGGCT     |
| <i>ND2</i>                      | GCCTGGAATTCAGCCTACTAGC  | GGCTGTTGCTTGTGTGACGA     |
| <i>UCP1</i>                     | GGCCTCTACGACTCAGTCCA    | TAAGCCGGCTGAGATCTTGT     |
| <i>PGC-1</i>                    | CCCTGCCATTGTTAAGACC     | TGCTGCTGTTCTGTTTTTC      |
| <i>DIO2</i>                     | CATGCTGACCTCAGAAGGGC    | CCCAGTTTAACCTGTTTGTAGGCA |
| <i>Cidea</i>                    | ATCACAACCTGGCCTGGTTACG  | TACTACCCGGTGTCCATTCT     |
| <i>Prdm16</i>                   | CAGCACGGTGAAGCCATTC     | GCGTGCATCCGCTTGTG        |
| <i>Dnm1</i>                     | TAGTGGGCAGGGACCTTCTT    | TGCTTCAACTCCATTTTCTTCTCC |
| <i>Mfn2</i>                     | CAGCAAGTTGACATCACCCG    | ACCAGCCAGCTTTATTCTCTGA   |
| <i>Mff</i>                      | AAGTGGCTCTCACCCCTAGCA   | TGCCCCACTCACCAAATGT      |
| <i>Opa1</i>                     | TTGCCAGTTTAGCTCCCGAC    | CCAGGTGAACCTGCAGTGAA     |
| <i>PPAR<math>\gamma</math></i>  | AGGCGAGGGCGATCTTGACAG   | AATTCGGATGGCCACCTCTTTG   |
| <i>C/EBP<math>\alpha</math></i> | AAACAACGCAACGTGGAGAC    | TGTCCAGTTCACGGCTCAG      |
| <i>C/EBP<math>\beta</math></i>  | GGTTTTCGGGACTTGATGCA    | CAACAACCCCGCAGGAAC       |
| <i><math>\beta</math>-actin</i> | TATTGGCAACGAGCGGTTCC    | GGCATAGAGGTCTTTACGGATGT  |

**Table S2. Antibody catalog number and source**

| <b>Name</b>    | <b>Catalogue Number</b> | <b>Source</b>                | <b>Dilutions used</b> |
|----------------|-------------------------|------------------------------|-----------------------|
| Actin          | 66009-1-Ig              | Proteintech                  | 1:5000                |
| DRP1           | 611112                  | BD transduction laboratories | 1:1000                |
| MFF            | 84580T                  | Cell Signaling Technology    | 1:1000                |
| MFN2           | 11925T                  | Cell Signaling Technology    | 1:1000                |
| Opal           | 80471T                  | Cell Signaling Technology    | 1:1000                |
| PGC-1 $\alpha$ | ab54481                 | Abcam                        | 1:1000                |
| PPAR $\gamma$  | # 2430                  | Cell Signaling Technology    | 1:1000                |
| SDHA           | 5839                    | Cell Signaling Technology    | 1:1000                |
| Tom20          | 42406S                  | Cell Signaling Technology    | 1:1000                |
| UCP1           | PA1-24894               | Invitrogen                   | 1:1000                |
| Prdm16         | NBP1-77096              | Novus Biologicals            | 1:1000                |
| HSP60          | # 4870                  | Cell Signaling Technology    | 1:1000                |
| C/EBP $\alpha$ | # 2295                  | Cell Signaling Technology    | 1:1000                |
